# Supplementary material for: Molecular Characterization of ANKRD1 in Rhabdomyosarcoma Cell Lines: Expression, Localization, and Proteasomal Degradation
Source: Preprints.org preprint supplement (doi:10.20944/preprints202309.0632.v1), 2023-09-11
Supplement: Supplementary file 1 [file supplementary]

**Table S1: Ct values  $\pm$  SD for ANKRD1 and GAPDH amplicons obtained in the qPCR analysis;**

**Figure S1: Original uncropped blots and membranes of Figure 2;**

**Figure S2: ANKRD1 is not sequestered in the pellet during the protein extraction procedure;**

**Figure S3: Control immunostaining of RMS cells;**

**Figure S4: ANKRD1 is not localized to PML nuclear bodies of RMS cells;**

**Figure S5: Original uncropped blots and membranes of Figure 5;**

**Figure S6: Original uncropped blots and membranes of Figure 6**

**Table S1**

|               | <b>ANKRD1</b> | <b>GAPDH</b> |
|---------------|---------------|--------------|
| <b>SJRH30</b> | 24.59 ± 0.97  | 16.01 ± 1.32 |
| <b>RD</b>     | 24.47 ± 0.39  | 16.17 ± 0.77 |
| <b>HS-729</b> | 23.39 ± 0.36  | 15.34 ± 0.61 |

**Table S1:** Ct values ± SD for ANKRD1 and GAPDH amplicons obtained in the qPCR analysis.

Figure S1

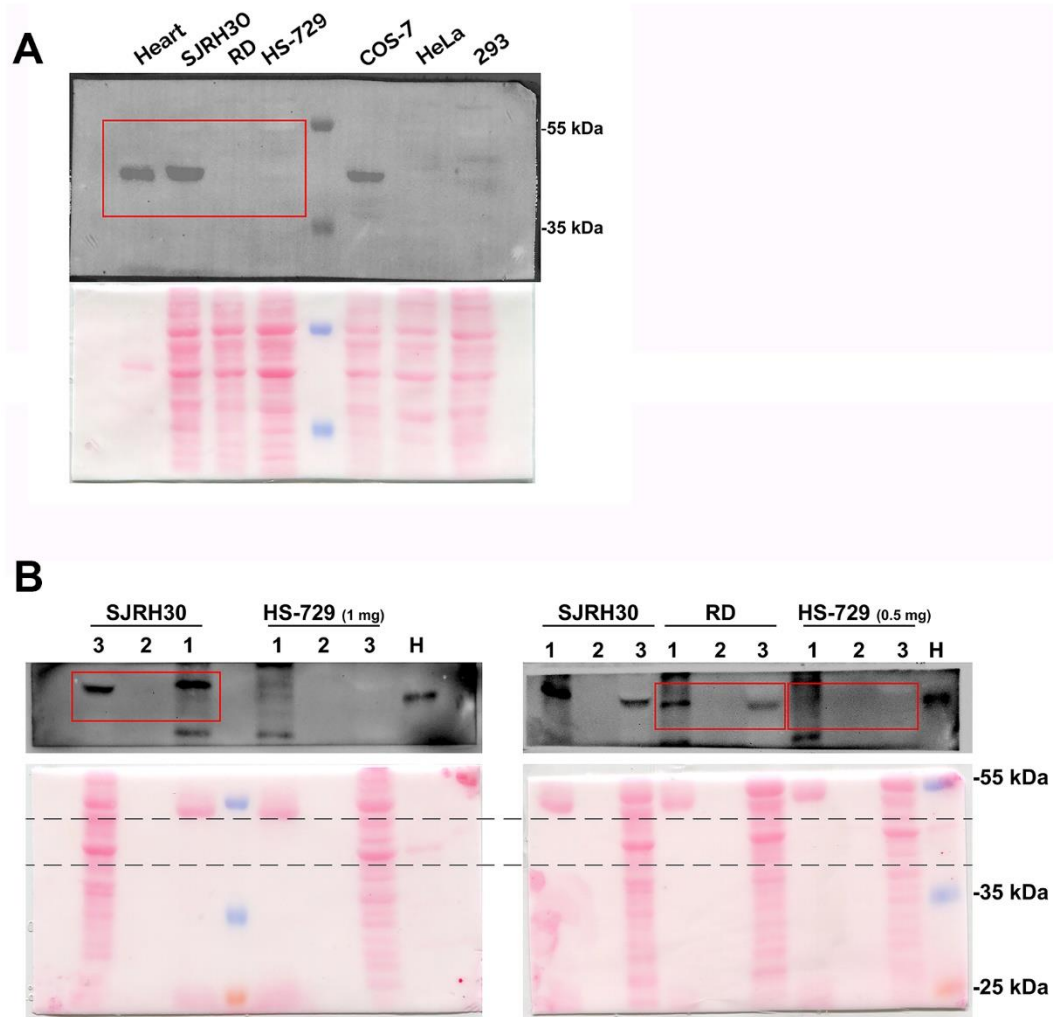

**Figure S1:** (A) Original uncropped blot and membrane of Figure 2A; square indicates parts presented. (B) Original uncropped blots and membranes of Figure 2B, squares indicate parts presented. ANKRD1 protein was detected after immunoprecipitation procedure using the anti-ANKRD1 antibody and 0.5 or 1 mg of total cellular proteins served as an input. Bands in lanes 1 correspond to heavy and light chains of immunoglobulins. Dashed lines enclose the part of the membrane used for the immunodetection of ANKRD1. Lane 1: input + anti-ANKRD1 + protein A/G; Lane 2: input + protein A/G; Lane 3: 5-15% input; H: human heart tissue extract used as a positive control.

**Figure S2**

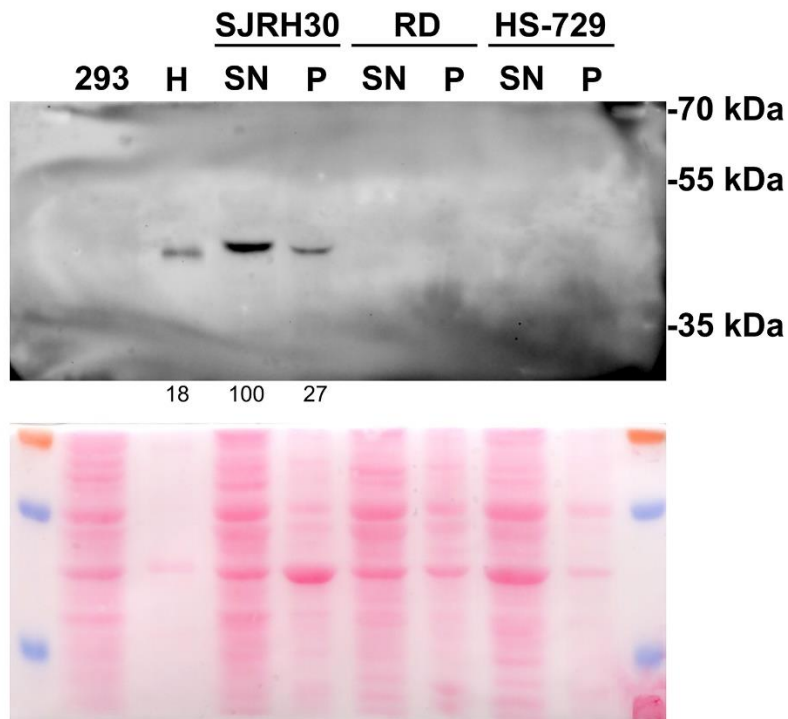

**Figure S2.** ANKRD1 is not sequestered in the pellet during the protein extraction procedure. ANKRD1 detection in the supernatants (SN) and pellets (P) after the protein extraction from RMS cells. Protein extract of human heart (H) was used as a positive and 293 cells as a negative control. Original blot and membrane are shown.

Figure S3

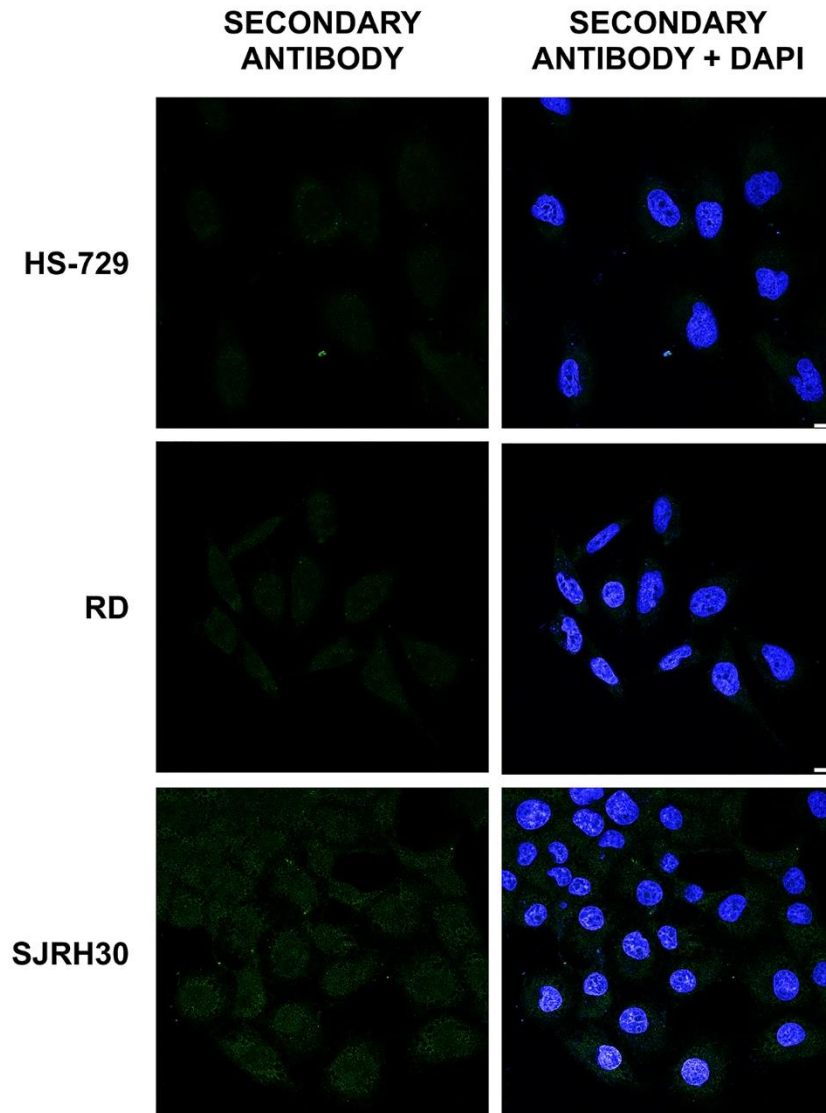

**Figure S3:** Control immunostaining of RMS cells. A fluorescent signal was not observed when the primary antibody was omitted. The nuclei were stained with DAPI. Scale bar = 10  $\mu\text{m}$ .

**Figure S4**

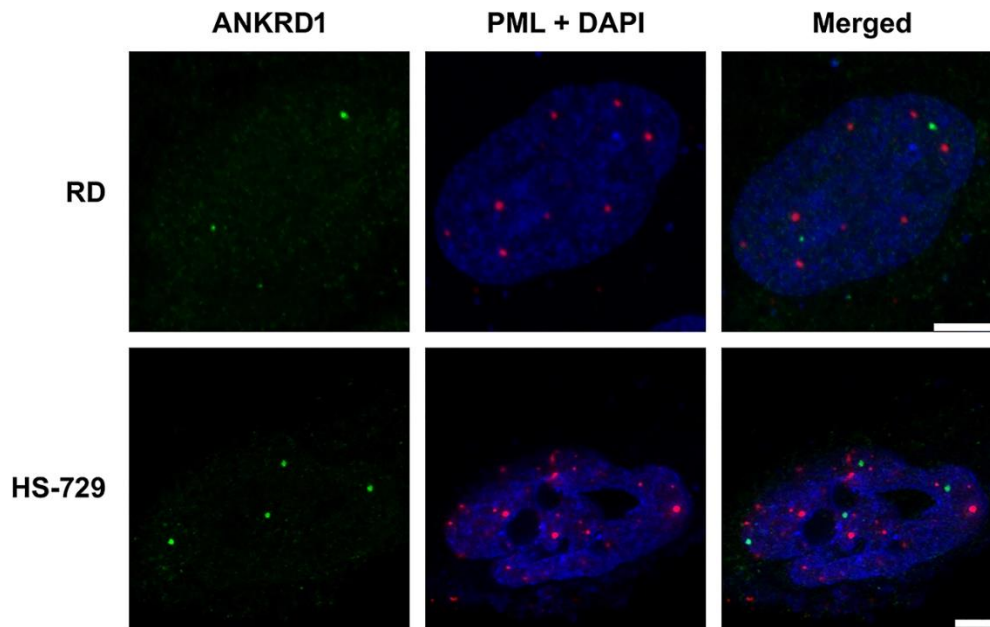

**Figure S4:** ANKRD1 is not localized to PML nuclear bodies of RMS cells. Cells were co-stained with anti-ANKRD1 (green) and anti-PML (red) antibodies. Nuclei were stained with DAPI. The scale bar = 5  $\mu$ m.

Figure S5

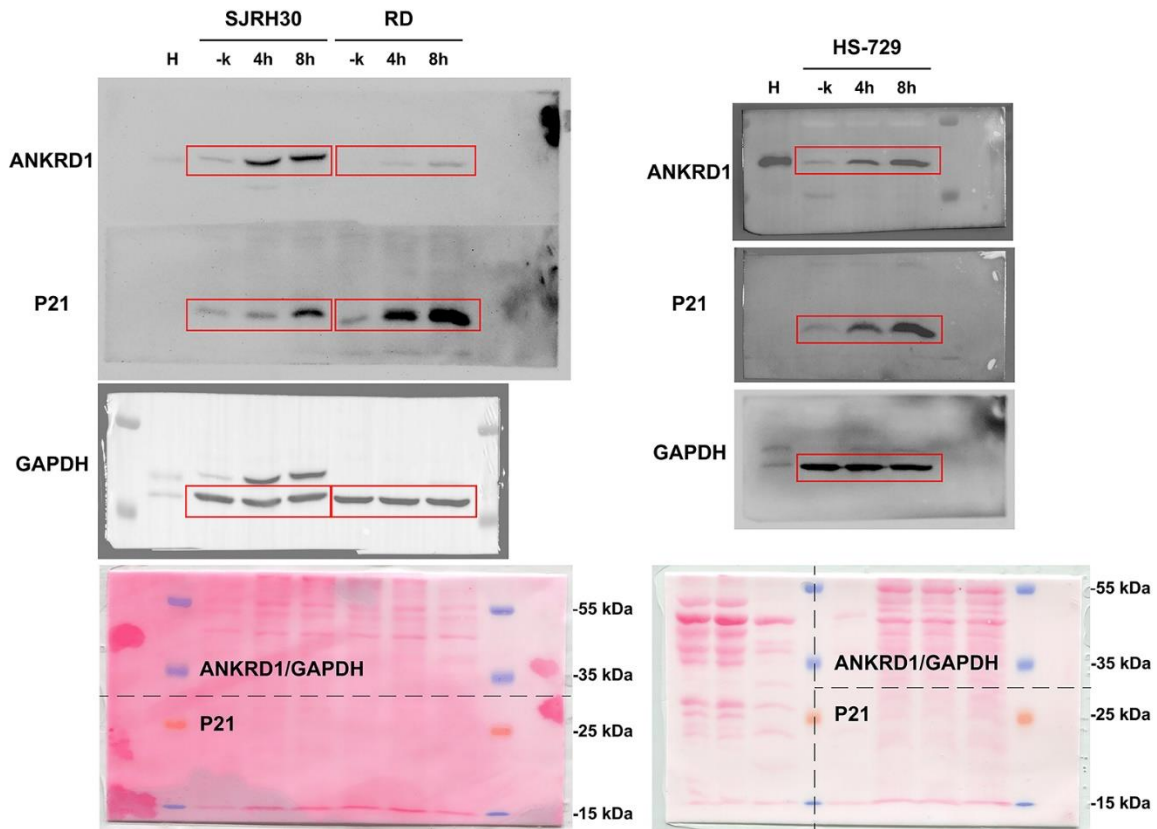

**Figure S5:** Original uncropped blots and membranes of Figure 5; squares indicate parts presented. Dashed lines enclose the parts of the membranes used for the immunodetection with indicated antibodies.

**Figure S6**

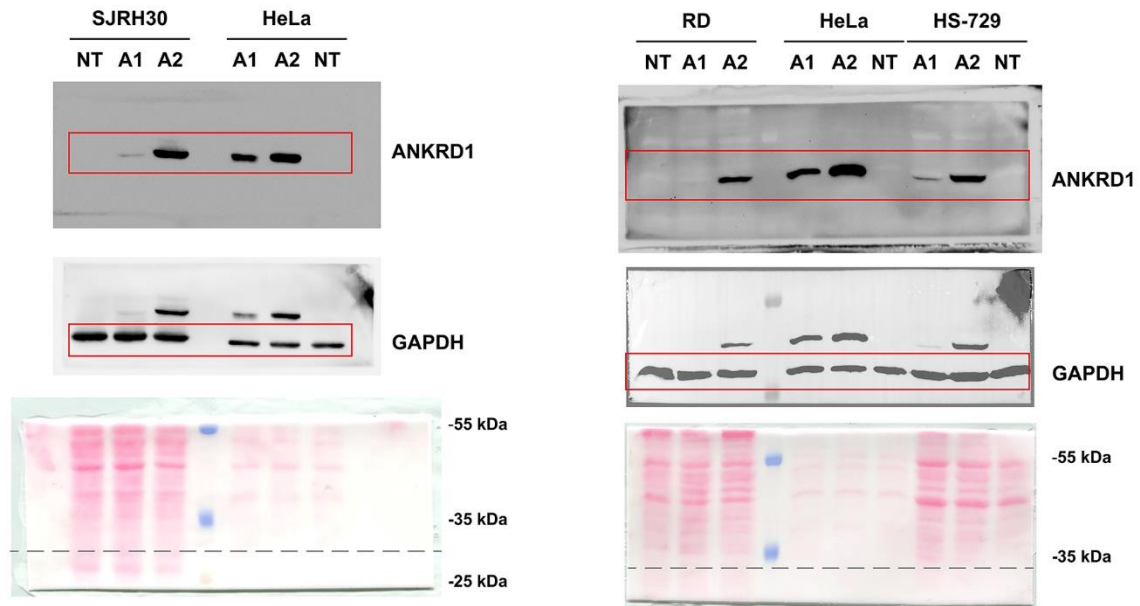

**Figure S6:** Original uncropped blots and membranes of Figure 6; squares indicate parts presented. Dashed lines enclose the parts of the membranes used for the immunodetection of ANKRD1 and GAPDH.
